# Supplementary material for: Complete capillary electrophoresis process on a drone: towards a flying micro-lab
Source: Royal Society of Chemistry journal article supplement (doi:10.1039/d0ay01220c), 2020-01-01
Supplement: d0ay01220c9.pdf [file d0ay01220c9.pdf]

Supplementary Table S-7. Calibration conditions and results

| No | Analyte                      | Calibration equation<br>y= | R <sup>2</sup> | Average Precision (%) | Calibration Range (mM) | Background electrolyte          | Injection | L <sub>tot</sub> (cm)* | L <sub>eff</sub> (cm)* |
|----|------------------------------|----------------------------|----------------|-----------------------|------------------------|---------------------------------|-----------|------------------------|------------------------|
| 1  | K <sup>+</sup>               | 0.3335x                    | 0.9964         | <10.3                 | 0.0058-0.3700          | 500 mM<br>CH <sub>3</sub> COOH  | 10s×20kPa | 30                     | 23.5                   |
| 2  | Ca <sup>2+</sup>             | 0.8642x                    | 0.9913         | <9.6                  | 0.0059-0.3818          |                                 |           |                        |                        |
| 3  | Na <sup>+</sup>              | 0.6226x                    | 0.9953         | <6.5                  | 0.0039-0.2500          |                                 |           |                        |                        |
| 4  | NH <sub>4</sub> <sup>+</sup> | 0.3363x                    | 0.9913         | <4.5                  | 0.0133-0.3127          |                                 |           |                        |                        |
| 5  | Diethylamine                 | 0.7199x                    | 0.9984         | <2.2                  | 0.0151-0.9680          |                                 |           |                        |                        |
| 6  | Triethylamine                | 0.9175x                    | 0.9967         | <3.3                  | 0.0112-0.7165          |                                 |           |                        |                        |
| 7  | BSA*                         | 18.202x                    | 0.9925         | <11.1                 | 0.0005-0.0341          |                                 |           |                        |                        |
| 8  | Formic acid                  | 0.1212x + 0.0021           | 0.9922         | <11.6                 | 0.0078-0.2500          | 150 mM<br>AMP**                 | 10s×20kPa | 35                     | 28.5                   |
| 9  | Acetic acid                  | 0.2909x + 0.0023           | 0.9857         | <10.3                 | 0.0078-0.2500          |                                 |           |                        |                        |
| 10 | Methylphosphonic acid        | 0.2465x                    | 0.9935         | <3.8                  | 0.0400-0.2000          | 10 mM<br>MES*** / L-<br>His**** | 5s×20kPa  | 35                     | 28.5                   |
| 11 | Ethylphosphonic acid         | 0.0867x + 0.0022           | 0.9925         | <8.0                  | 0.0400-0.1000          |                                 |           |                        |                        |
| 12 | Propylphosphonic acid        | 0.0857x + 0.0028           | 0.9934         | <8.8                  | 0.0400-0.1000          |                                 |           |                        |                        |
| 13 | Ethyl methylphosphonate      | 0.0725x + 0.0011           | 0.9956         | <12.6                 | 0.0400-0.1000          |                                 |           |                        |                        |
| 14 | Pinacoyl methylphosphonate   | 0.0587x + 0.0007           | 0.9809         | <6.2                  | 0.0400-0.1000          |                                 |           |                        |                        |

\* BSA – Bovine serum albumin

- \*\* AMP - 2-Amino-2-methyl-1-propanol
- \*\*\* MES - 2-(N-morpholino)ethanesulfonic acid
- \*\*\*\* L-His - L-histidine
