# Supplementary material for: Complete capillary electrophoresis process on a drone: towards a flying micro-lab
Source: Royal Society of Chemistry journal article supplement (doi:10.1039/d0ay01220c), 2020-01-01
Supplement: d0ay01220c10.pdf [file d0ay01220c10.pdf]

Supplementary Table S-8. Sampling conditions

| No | Analyte                      | Reagent concentration | Method      | Concentration in the air (ppm) | Added | Sampling Time (min) | Determined in collected sample (mM) |
|----|------------------------------|-----------------------|-------------|--------------------------------|-------|---------------------|-------------------------------------|
| 1  | CH <sub>3</sub> COOH         | 99.9 %                | Evaporation | 79.3                           | 10 μL | 16                  | 0.0647 ± 0.0026                     |
| 2  | CH <sub>3</sub> COOH         | 99.9 %                | Evaporation | 15.9                           | 2 μL  | 16                  | 0.0229 ± 0.0013                     |
| 3  | HCOOH                        | 99.9 %                | Evaporation | 120.3                          | 10 μL | 16                  | 0.1074 ± 0.0114                     |
| 4  | HCOOH                        | 99.9 %                | Evaporation | 24.0                           | 2 μL  | 16                  | 0.0490 ± 0.0036                     |
| 5  | NH <sub>4</sub> <sup>+</sup> | 25 %                  | Evaporation | 51.2                           | 10 μL | 4                   | 0.0381 ± 0.0108                     |
| 6  | NH <sub>4</sub> <sup>+</sup> | 25 %                  | Evaporation | 51.2                           | 10 μL | 8                   | 0.0985 ± 0.0070                     |
| 7  | NH <sub>4</sub> <sup>+</sup> | 25 %                  | Evaporation | 51.2                           | 10 μL | 16                  | 0.1297 ± 0.0072                     |
| 8  | NH <sub>4</sub> <sup>+</sup> | 0.5 %                 | Evaporation | 1.0                            | 10 μL | 32                  | 0.0184 ± 0.0009                     |
| 9  | DEA*                         | 99.9 %                | Evaporation | 43.9                           | 10 μL | 4                   | 0.0298 ± 0.0034                     |
| 10 | DEA                          | 99.9 %                | Evaporation | 43.9                           | 10 μL | 8                   | 0.0750 ± 0.0022                     |
| 11 | DEA                          | 99.9 %                | Evaporation | 43.9                           | 10 μL | 16                  | 0.0706 ± 0.0029                     |
| 12 | DEA                          | 2.0 %                 | Evaporation | 1.3                            | 15 μL | 32                  | 0.0090 ± 0.0007                     |
| 13 | TEA**                        | 99.9 %                | Evaporation | 32.5                           | 10 μL | 4                   | 0.0209 ± 0.0035                     |
| 14 | TEA                          | 99.9 %                | Evaporation | 32.5                           | 10 μL | 8                   | 0.0577 ± 0.0037                     |

|    |                  |            |                        |        |            |    |                        |
|----|------------------|------------|------------------------|--------|------------|----|------------------------|
| 15 | TEA              | 99.9 %     | Evaporation            | 32.5   | 10 $\mu$ L | 16 | 0.1102 $\pm$<br>0.0038 |
| 16 | TEA              | 2.0 %      | Evaporation            | 1.0    | 15 $\mu$ L | 32 | 0.0384 $\pm$<br>0.0042 |
| 17 | K <sup>+</sup>   | 32 mg/ L   | Ultrasonic atomization | N/A*** | N/A        | 4  | 0.0303 $\pm$<br>0.0020 |
| 18 | K <sup>+</sup>   | 32 mg/ L   | Ultrasonic atomization | N/A    | N/A        | 8  | 0.0305 $\pm$<br>0.0023 |
| 19 | K <sup>+</sup>   | 32 mg/ L   | Ultrasonic atomization | N/A    | N/A        | 16 | 0.0391 $\pm$<br>0.0044 |
| 20 | Na <sup>+</sup>  | 1727 mg/ L | Ultrasonic atomization | N/A    | N/A        | 4  | 0.0750 $\pm$<br>0.0080 |
| 21 | Na <sup>+</sup>  | 1727 mg/ L | Ultrasonic atomization | N/A    | N/A        | 8  | 0.2006 $\pm$<br>0.0104 |
| 22 | Ca <sup>2+</sup> | 552 mg/ L  | Ultrasonic atomization | N/A    | N/A        | 4  | 0.0123 $\pm$<br>0.0020 |
| 23 | Ca <sup>2+</sup> | 552 mg/ L  | Ultrasonic atomization | N/A    | N/A        | 8  | 0.0331 $\pm$<br>0.0024 |
| 24 | BSA****          | 1 mg/ mL   | Ultrasonic atomization | N/A    | N/A        | 8  | 0.0034 $\pm$<br>0.0006 |
| 25 | BSA              | 1 mg/ mL   | Ultrasonic atomization | N/A    | N/A        | 16 | 0.0076 $\pm$<br>0.0003 |

DEA\* - Diethylamine

TEA\*\* - Triethylamine

N/A\*\*\* - Not applicable

BSA\*\*\*\* - Bovine serum albumin
