# Supplementary figures and images for: Complete capillary electrophoresis process on a drone: towards a flying micro-lab
Source: Royal Society of Chemistry journal article supplement (doi:10.1039/d0ay01220c), 2020-01-01

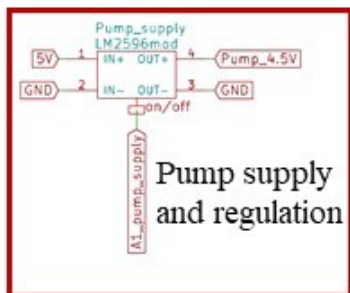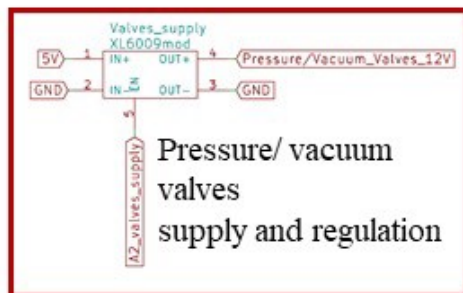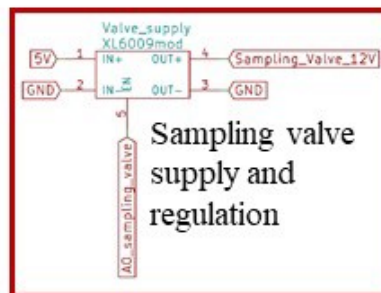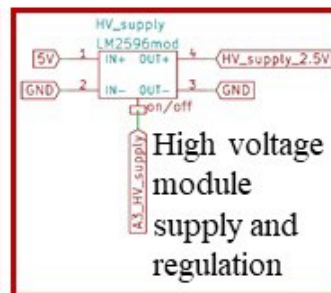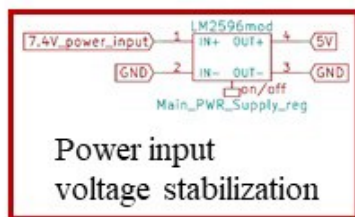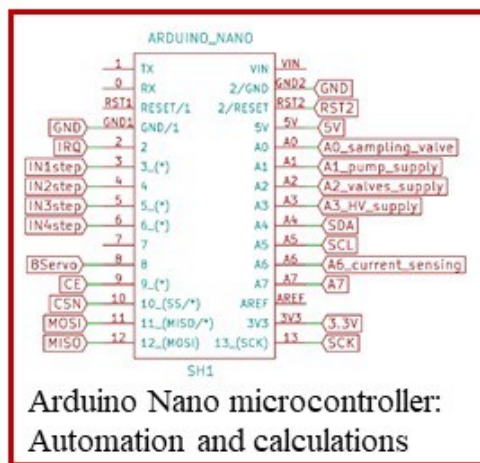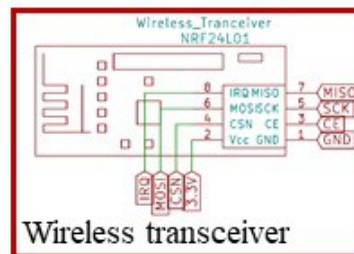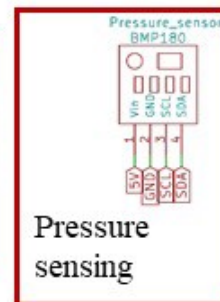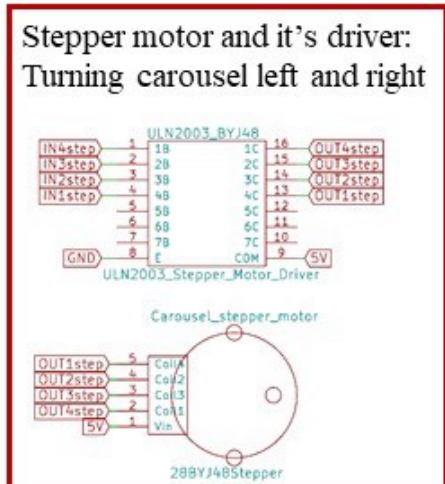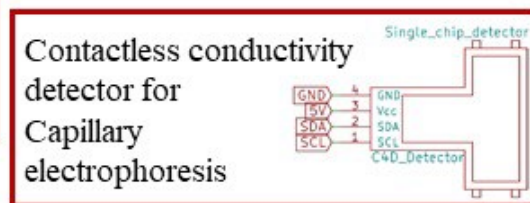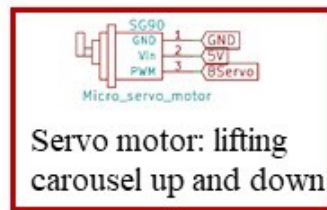

Dr. Tomas Drevinskas

Sheet: /  
 File: CeCube2\_2018 04 19.sch

**Title: CE\_Cube\_PCB**

Size: A4 Date: 2018-04-19  
 KiCad E.D.A. kicad 4.0.7

Rev: 3  
 Id: 1/1

Supplement: d0ay01220c1.pdf [file d0ay01220c1.pdf]

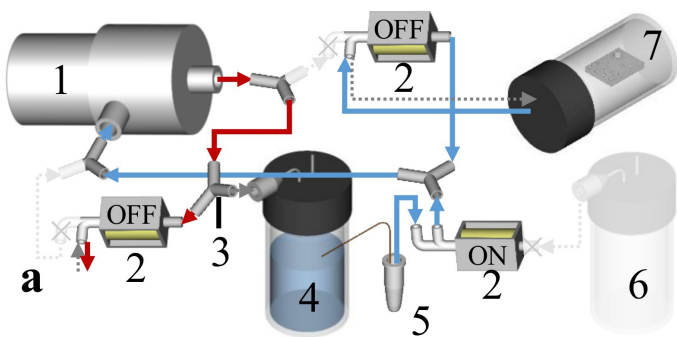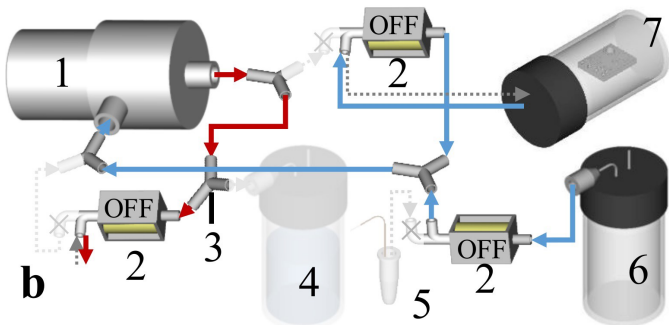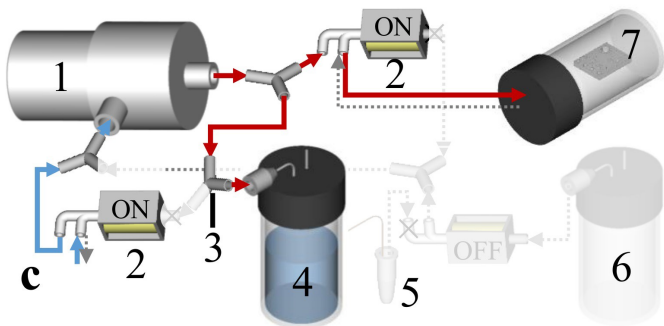

→ Pressure line    → Vacuum line

..... Inactive line    × Closed valve port

Supplement: d0ay01220c2.pdf [file d0ay01220c2.pdf]

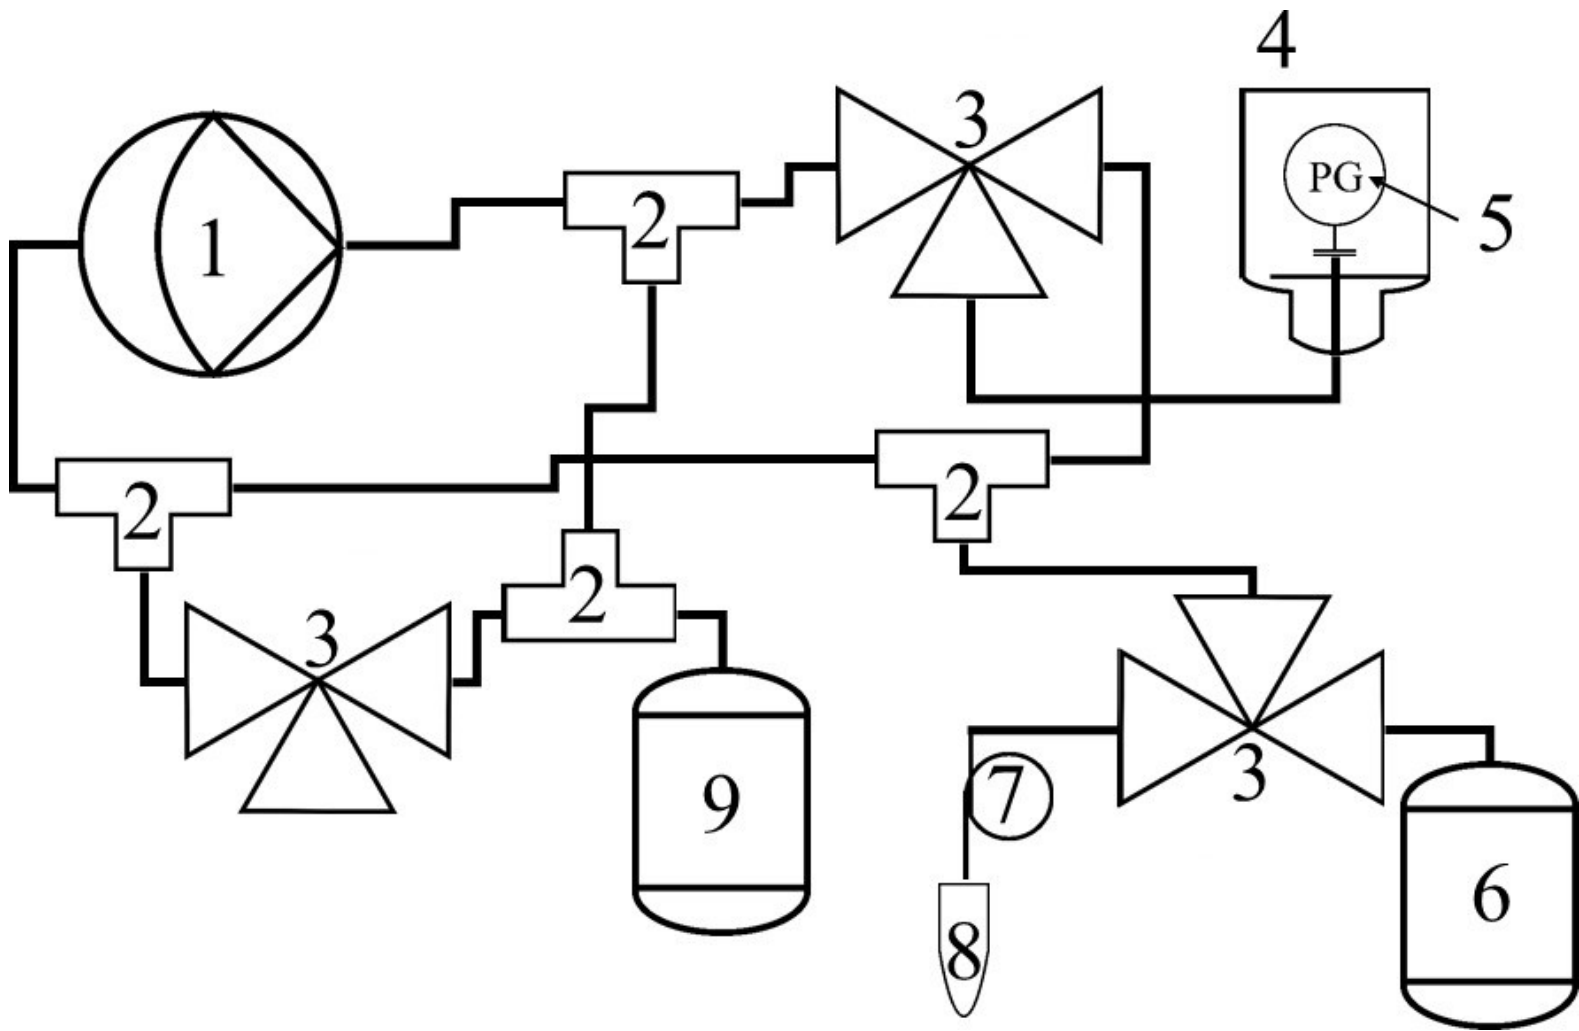

Supplement: d0ay01220c3.pdf [file d0ay01220c3.pdf]

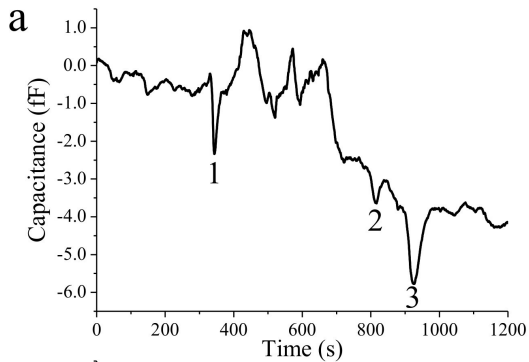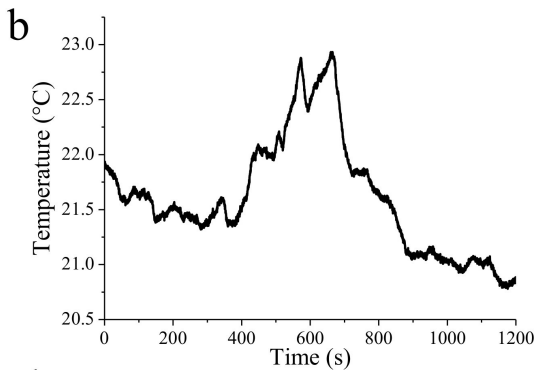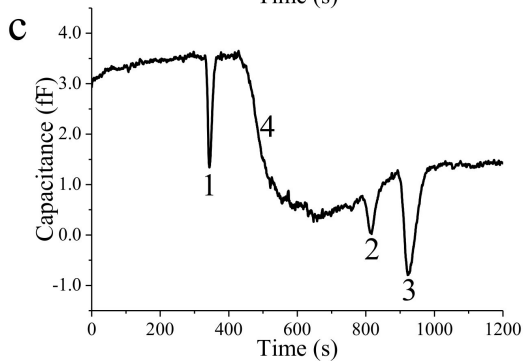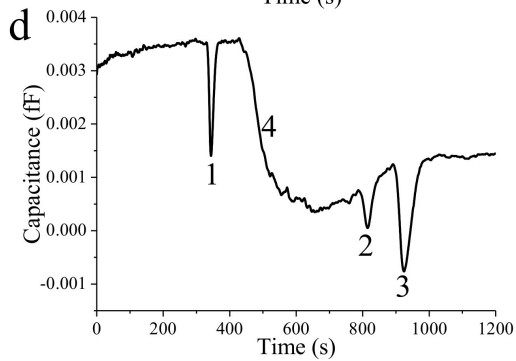

Supplement: d0ay01220c4.pdf [file d0ay01220c4.pdf]

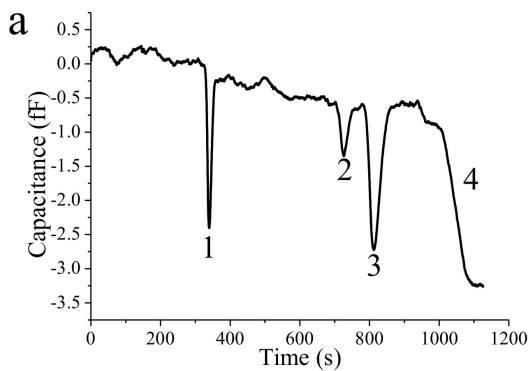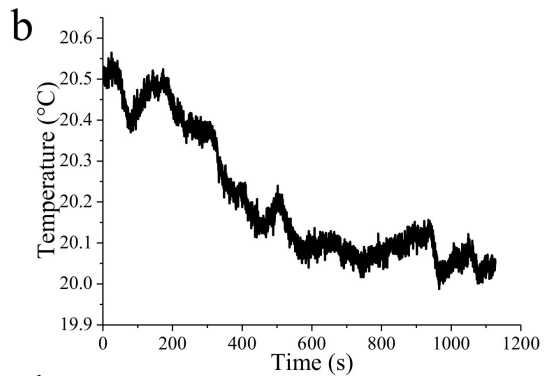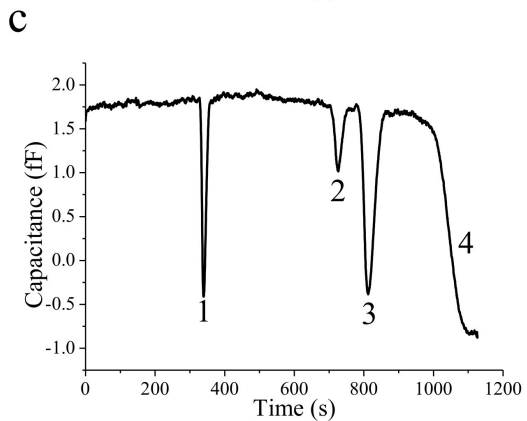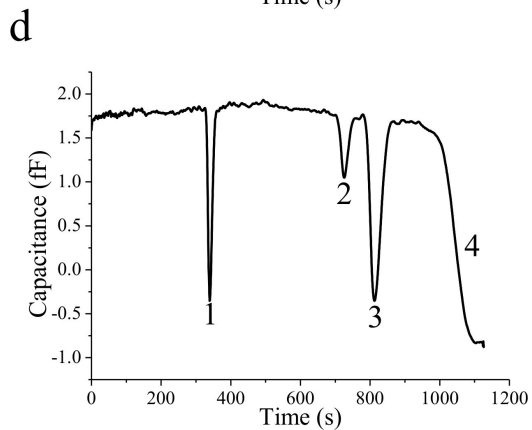

Supplement: d0ay01220c5.pdf [file d0ay01220c5.pdf]

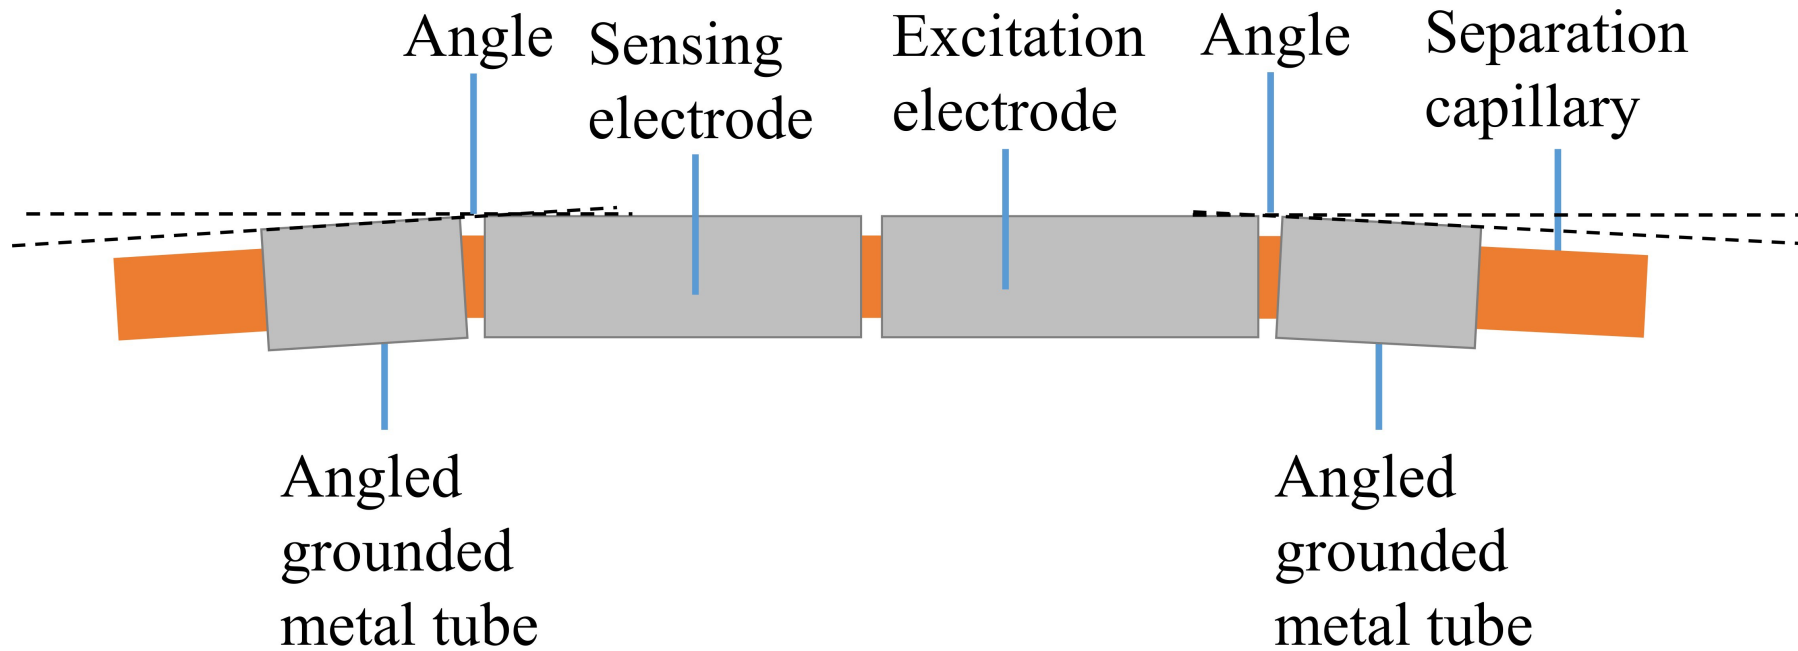

Supplement: d0ay01220c6.pdf [file d0ay01220c6.pdf]
